# Supplementary material for: CO adsorption, oxidation and carbonate formation mechanisms on Fe3O4 surfaces
Source: Royal Society of Chemistry journal article supplement (doi:10.1039/c7cp02760e), 2017-01-01

SUPPORTING INFORMATION

*CO adsorption, oxidation and carbonate formation mechanisms on  $Fe_3O_4$  surfaces*

Xiaohu Yu<sup>a, b, c\*</sup>, Xuemei Zhang<sup>a</sup>, Lingxia Jin<sup>a</sup> and Gang Feng<sup>b, c</sup>

(a) Institute of Theoretical and Computational Chemistry, Shaanxi Key Laboratory of Catalysis, School of Chemical & Environment Sciences, Shaanxi University of Technology, Hanzhong 723000, China; (b) State Key laboratory of Coal Conversion, Institute of Coal Chemistry, Chinese Academy of Sciences, Taiyuan, Shanxi 030001, China; (c) College of Chemistry, Nanchang University, Nanchang, Jiangxi 330031, China. E-mail address: [yuxiaohu950203@126.com](mailto:yuxiaohu950203@126.com)

Figure S1. Configurations of least stable CO adsorption and oxidation on Fe<sub>tet1</sub> termination

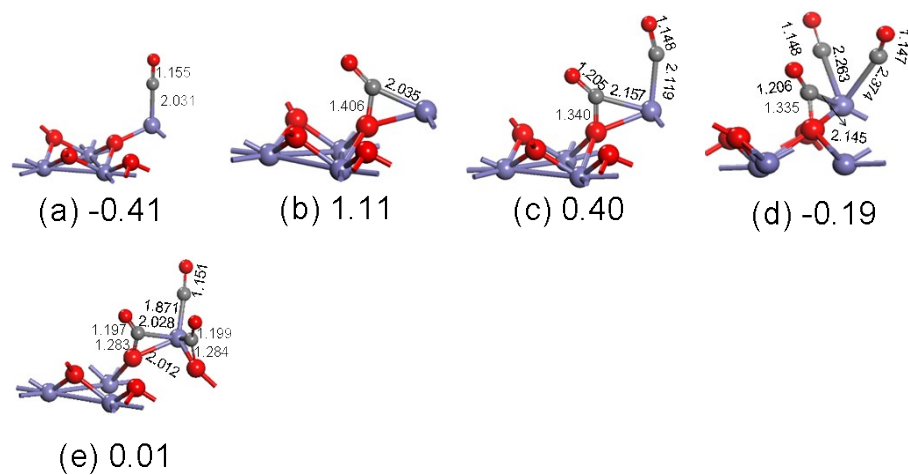

Figure S2. Configurations of least stable CO adsorption and oxidation on Fe<sub>oct2</sub> termination

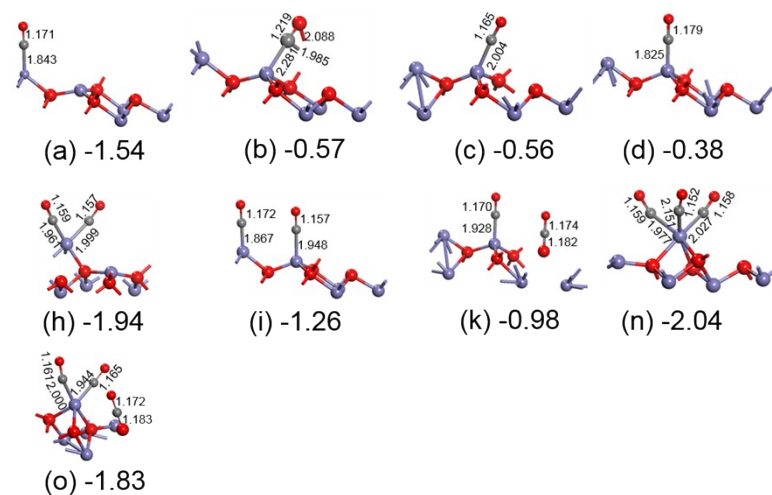

Figure S3. Configurations of least stable CO adsorption, oxidation and carbonate on  $\text{Fe}_3\text{O}_4(110)$  A layer.

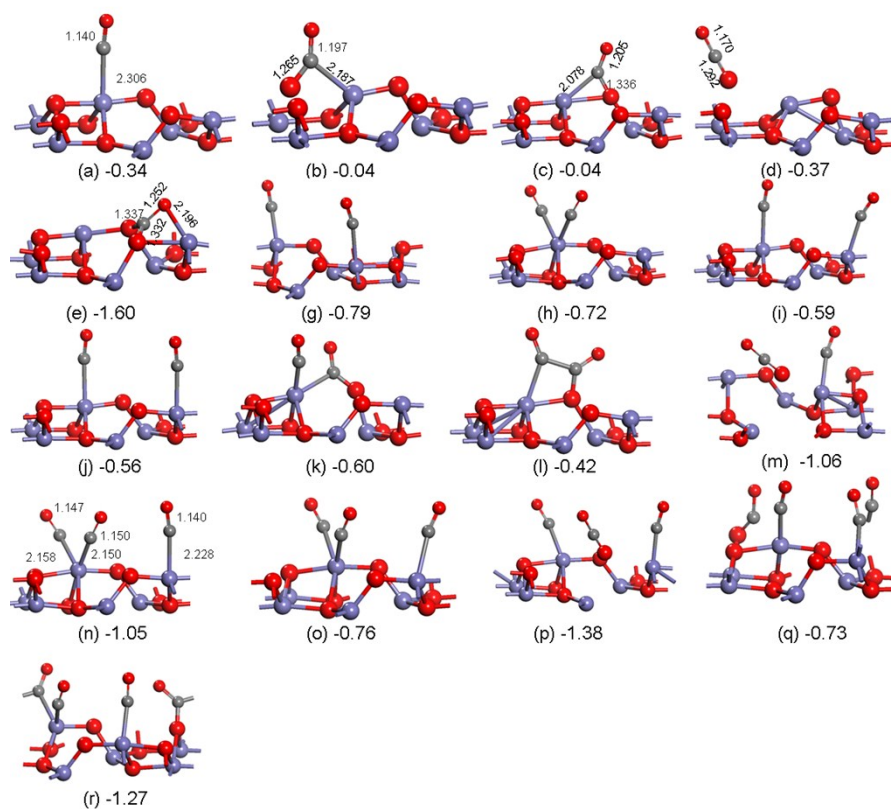

Figure S4. Configurations of least stable CO adsorption and oxidation on  $\text{Fe}_3\text{O}_4(110)$  B layer.

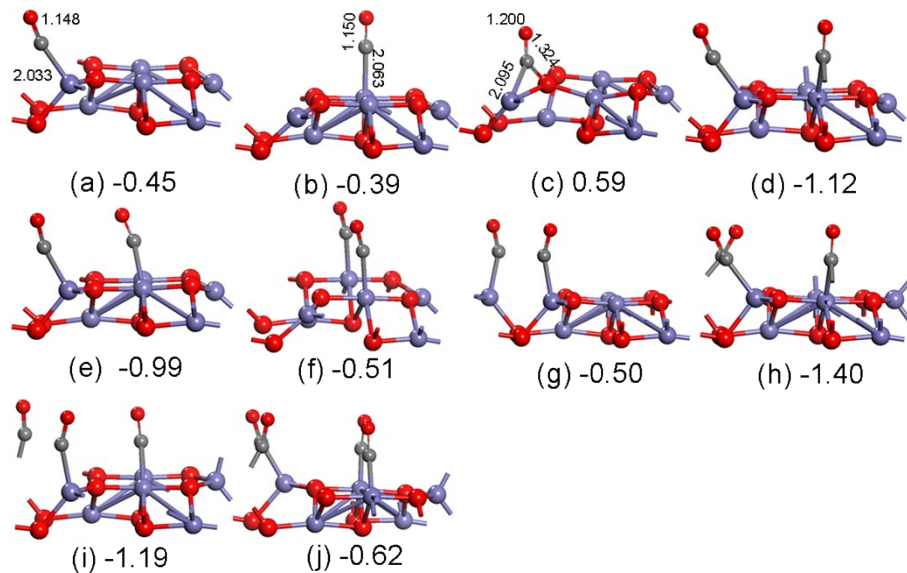

Figure S5. Configurations of least stable CO adsorption, oxidation and carbonate on on  $\text{Fe}_3\text{O}_4(001)$  B termination.

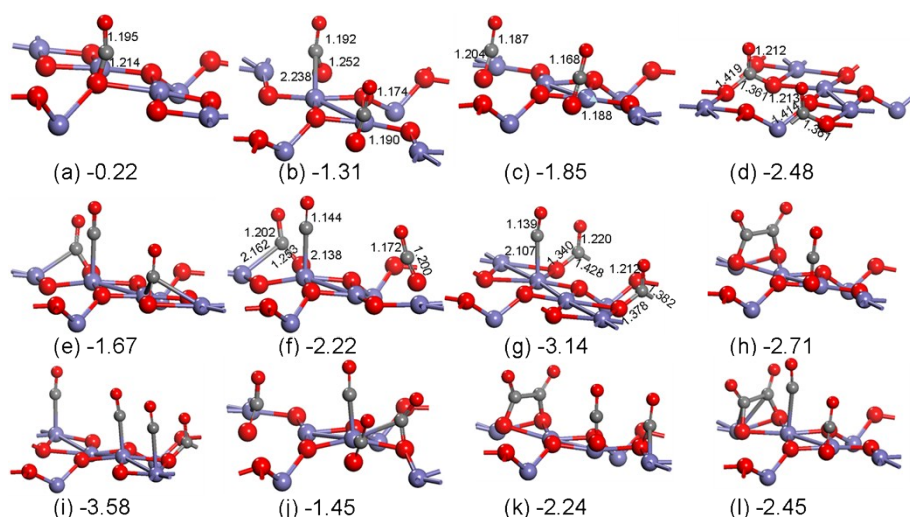

Supplement: c7cp02760e1.pdf [file c7cp02760e1.pdf]
